# Supplementary material for: Development and Validation of Prognostic Models to Estimate the Risk of Overt Hepatic Encephalopathy After TIPS Creation: A Multicenter Study
Source: PubMed Central journal article supplement — Clin Transl Gastroenterol. 2022 Jan 27;13(3):e00461. doi: 10.14309/ctg.0000000000000461 (PMC8963844; doi:10.14309/ctg.0000000000000461), 2022-01-27
Supplement: ct9-13-e00461-s002.pdf [file ct9-13-e00461-s002.pdf]

**Supplement Table 1.** Baseline characteristics of the validation cohort.

|                                                  | <b>Total<br/>n=182</b> | <b>Without overt HE<br/>(n=149)</b> | <b>With overt HE<br/>(n=33)</b> | <b>P value</b> |
|--------------------------------------------------|------------------------|-------------------------------------|---------------------------------|----------------|
| <b>Demographics and clinical characteristics</b> |                        |                                     |                                 |                |
| Age (per year)                                   | 57.1 (12.8)            | 55.4 (12.5)                         | 65.1 (11.2)                     | <0.001         |
| Sex (Male)                                       | 110 (60.4%)            | 84 (56.4%)                          | 26 (78.8%)                      | 0.029          |
| Etiology of cirrhosis                            |                        |                                     |                                 | 0.095          |
| Virus related                                    | 109 (59.9%)            | 90 (60.4%)                          | 19 (57.6%)                      |                |
| Alcohol related                                  | 12 (6.6%)              | 7 (4.7%)                            | 5 (15.2%)                       |                |
| Others                                           | 61 (33.5%)             | 52 (34.9%)                          | 9 (27.3%)                       |                |
| TIPS indication                                  |                        |                                     |                                 | 0.033          |
| Variceal bleeding                                | 167 (91.8%)            | 140 (94.0%)                         | 27 (81.8%)                      |                |
| Refractory ascites                               | 15 (8.24%)             | 9 (6.04%)                           | 6 (18.2%)                       |                |
| L3 SMI (cm <sup>2</sup> /m <sup>2</sup> )        |                        |                                     |                                 |                |
| Male                                             | 41.3 (8.7)             | 42.8 (8.7)                          | 36.6 (7.0)                      | 0.001          |
| Female                                           | 34.7 (5.9)             | 35.0 (3.7)                          | 32.4 (6.0)                      | 0.140          |
| Sarcopenia (Yes)                                 | 146 (80.2%)            | 114 (76.5%)                         | 32 (97.0%)                      | 0.015          |
| Child-Pugh score                                 | 7.03 (1.35)            | 6.92 (1.32)                         | 7.55 (1.42)                     | 0.025          |
| Child-Pugh class                                 |                        |                                     |                                 | 0.031          |
| A                                                | 72 (39.6%)             | 63 (42.3%)                          | 9 (27.3%)                       |                |
| B                                                | 102 (56.0%)            | 82 (55.0%)                          | 20 (60.6%)                      |                |
| C                                                | 8 (4.40%)              | 4 (2.68%)                           | 4 (12.1%)                       |                |
| MELD                                             | 11.0 (3.09)            | 10.9 (3.18)                         | 11.3 (2.64)                     | 0.531          |
| MELD-Na                                          | 11.5 (4.07)            | 11.5 (4.17)                         | 11.8 (3.64)                     | 0.643          |
| <b>Laboratory parameters</b>                     |                        |                                     |                                 |                |
| Bilirubin (μmol/L)                               | 23.9 (13.7)            | 24.3 (13.8)                         | 22.4 (13.2)                     | 0.460          |

|                              |             |             |             |       |
|------------------------------|-------------|-------------|-------------|-------|
| Albumin (g/L)                | 31.1 (6.24) | 31.2 (6.16) | 30.8 (6.67) | 0.775 |
| Creatinine (μmol/L)          | 64.4 (23.3) | 62.4 (18.9) | 73.3 (36.1) | 0.102 |
| Sodium (mmol/L)              | 139 (3.84)  | 139 (3.83)  | 138 (3.89)  | 0.454 |
| Prothrombin time (s)         | 16.4 (2.72) | 16.4 (2.77) | 16.1 (2.51) | 0.435 |
| INR                          | 1.40 (0.25) | 1.41 (0.26) | 1.35 (0.23) | 0.231 |
| <b>Radiological findings</b> |             |             |             |       |
| Ascites                      |             |             |             | 0.249 |
| No                           | 87 (47.8%)  | 80 (53.7%)  | 7 (21.2%)   |       |
| Mild                         | 54 (29.7%)  | 41 (27.5%)  | 13 (39.4%)  |       |
| Moderate                     | 30 (16.5%)  | 20 (13.4%)  | 10 (30.3%)  |       |
| Severe                       | 11 (6.1%)   | 8 (5.37%)   | 3 (9.1%)    |       |
| Portal vein thrombosis       | 42 (23.1%)  | 34 (22.8%)  | 8 (24.2%)   | 1.000 |
| <b>TIPS treatment</b>        |             |             |             |       |
| PrePPG                       | 23.0 (5.94) | 23.5 (6.17) | 21.8 (5.21) | 0.235 |
| PostPPG                      | 11.8 (4.86) | 12.5 (4.81) | 9.83 (4.57) | 0.037 |
| PPGchange                    | 11.3 (4.18) | 11.1 (4.37) | 11.9 (3.63) | 0.379 |

SMI skeletal muscle index, MELD model for end-stage liver disease, INR international normalized ratio, PPG portal pressure gradient

**Supplement Table 2.** Performance of three models in the validation cohort.

| <b>Indices</b>           | <b>Model 1</b>   | <b>Model 2</b>   | <b>Model 3</b>   |
|--------------------------|------------------|------------------|------------------|
| <b>Discrimination</b>    |                  |                  |                  |
| c statistic              | 0.69 (0.58-0.79) | 0.73 (0.64-0.82) | 0.78 (0.68-0.86) |
| <b>Calibration</b>       |                  |                  |                  |
| Brier score              | 0.14 (0.11-0.17) | 0.14 (0.11-0.16) | 0.13 (0.10-0.15) |
| P value*                 | 0.18             | 0.32             | 0.21             |
| <b>Overall</b>           |                  |                  |                  |
| <b>performance</b>       | 11.2             | 17.4             | 23.6             |
| R <sup>2</sup> value (%) | 278              | 268              | 257              |
| AIC                      |                  |                  |                  |

Model 1/2/3 indicates the core/sarcopenia/full model.

† NRI were calculated with reference to model 1 (model 2/model 3 vs. model 1)

\* P value was calculated by Hosmer-Lemeshow goodness-of-fit test.

NRI Net reclassification improvement, AIC Akaike information criterion.

**Supplement Table 3.** Performance of three models in the derivation cohort using only available data (n=224).

| <b>Indices</b>           | <b>Model 1</b>   | <b>Model 2</b>     | <b>Model 3</b>     |
|--------------------------|------------------|--------------------|--------------------|
| <b>Discrimination</b>    |                  |                    |                    |
| c statistic              | 0.67 (0.59-0.74) | 0.71 (0.64-0.78)   | 0.76 (0.70-0.83)   |
| <b>NRI<sup>†</sup></b>   |                  |                    |                    |
| NRI for events           |                  | 3.4 (-12.3 – 29.4) | 22.4 (0 – 42.8)    |
| NRI for non-events       | reference        | 4.0 (-5.9 – 26.4)  | 10.8 (-2.8 – 28.3) |
| Overall NRI              |                  | 7.4 (-3.0 – 36.4)  | 33.2 (7.2 – 58.5)  |
| P value                  |                  | 0.364              | 0.012              |
| <b>Calibration</b>       |                  |                    |                    |
| Brier score              | 0.17 (0.15-0.20) | 0.17 (0.14-0.19)   | 0.16 (0.13-0.18)   |
| P value*                 | 0.48             | 0.69               | 0.13               |
| <b>Overall</b>           |                  |                    |                    |
| <b>performance</b>       | 9.7              | 15.9               | 23.4               |
| R <sup>2</sup> value (%) | 254              | 245                | 233                |
| AIC                      |                  |                    |                    |

Model 1/2/3 indicates the core /sarcopenia /full model.

<sup>†</sup> NRI were calculated with reference to model 1 (model 2 /model 3 vs. model 1)

\* P value was calculated by Hosmer-Lemeshow goodness-of-fit test.

NRI Net reclassification improvement, AIC Akaike information criterion.

**Supplement Table 4.** Hazard ratio and regression coefficients of each variable fitted with Fine and Gray regression model.

| Variable                | Core model       |             | Sarcopenia model |             | Full model       |             |
|-------------------------|------------------|-------------|------------------|-------------|------------------|-------------|
|                         | sHR (95%CI)      | coefficient | sHR (95%CI)      | coefficient | sHR (95%CI)      | coefficient |
| <b>Intercept</b>        | ...              | ...         | ...              | ...         | ...              | ...         |
| <b>Age</b>              | 1.03 (1.01-1.05) | 0.03        | 1.03 (1.01-1.05) | 0.03        | 1.02 (1.00-1.04) | 0.02        |
| <b>Child-Pugh class</b> |                  |             |                  |             |                  |             |
| <b>B</b>                | 3.82 (1.41-10.4) | 1.34        | 3.30 (1.21-9.02) | 1.19        | 3.14 (1.16-8.46) | 1.14        |
| <b>C</b>                | 5.36 (1.67-17.2) | 1.76        | 4.51 (1.42-14.3) | 1.51        | 4.59 (1.43-14.7) | 1.52        |
| <b>Sarcopenia</b>       | ...              | ...         | 3.09 (1.59-6.31) | 1.13        | 3.25 (1.87-5.93) | 1.18        |
| <b>Post-TIPS PPG</b>    | ...              | ...         | ...              | ...         | 0.88 (0.82-0.95) | -0.13       |

sHR subdistributional hazard ratio, PPG portal pressure gradient.
