# Supplementary figures and images for: Development and Validation of Prognostic Models to Estimate the Risk of Overt Hepatic Encephalopathy After TIPS Creation: A Multicenter Study
Source: PubMed Central journal article supplement — Clin Transl Gastroenterol. 2022 Jan 27;13(3):e00461. doi: 10.14309/ctg.0000000000000461 (PMC8963844; doi:10.14309/ctg.0000000000000461), 2022-01-27

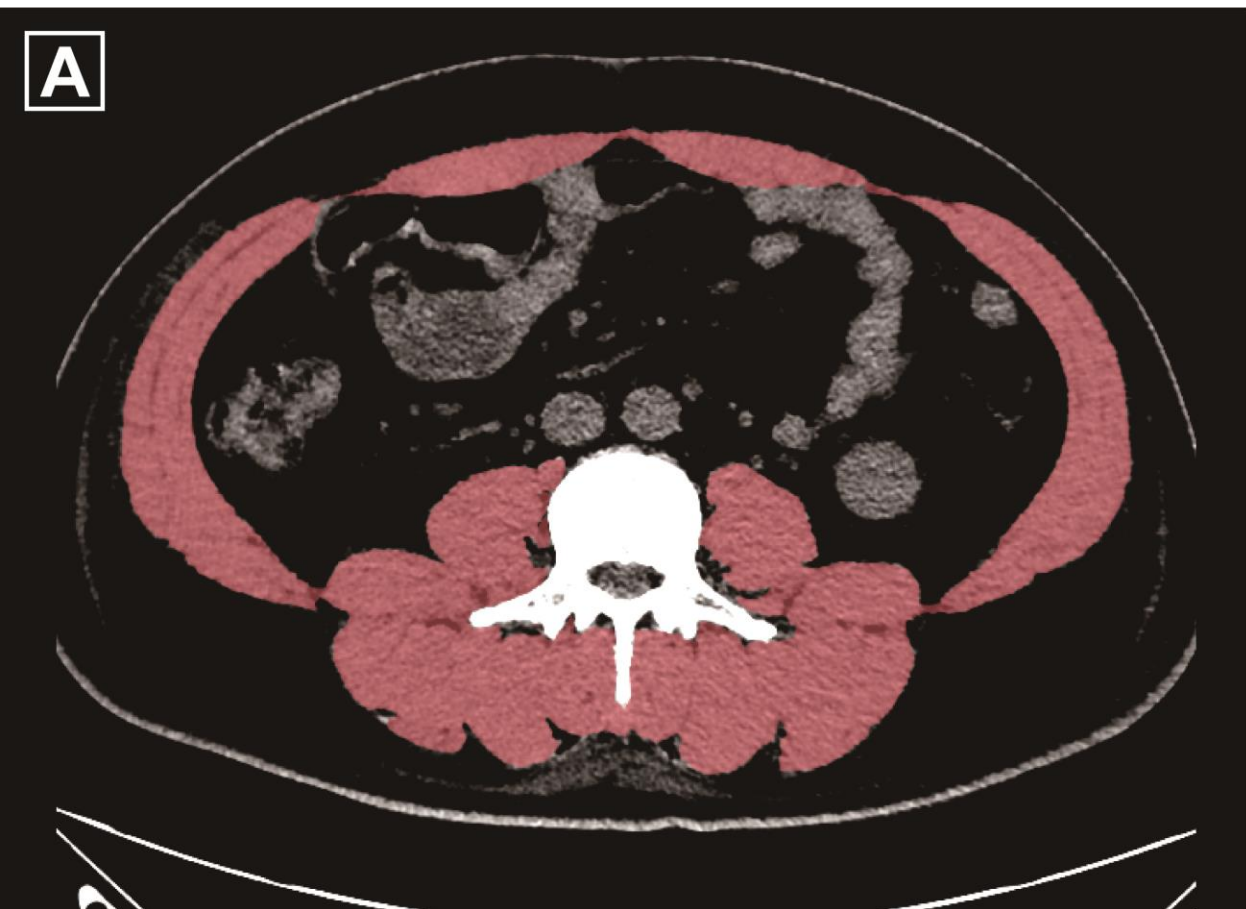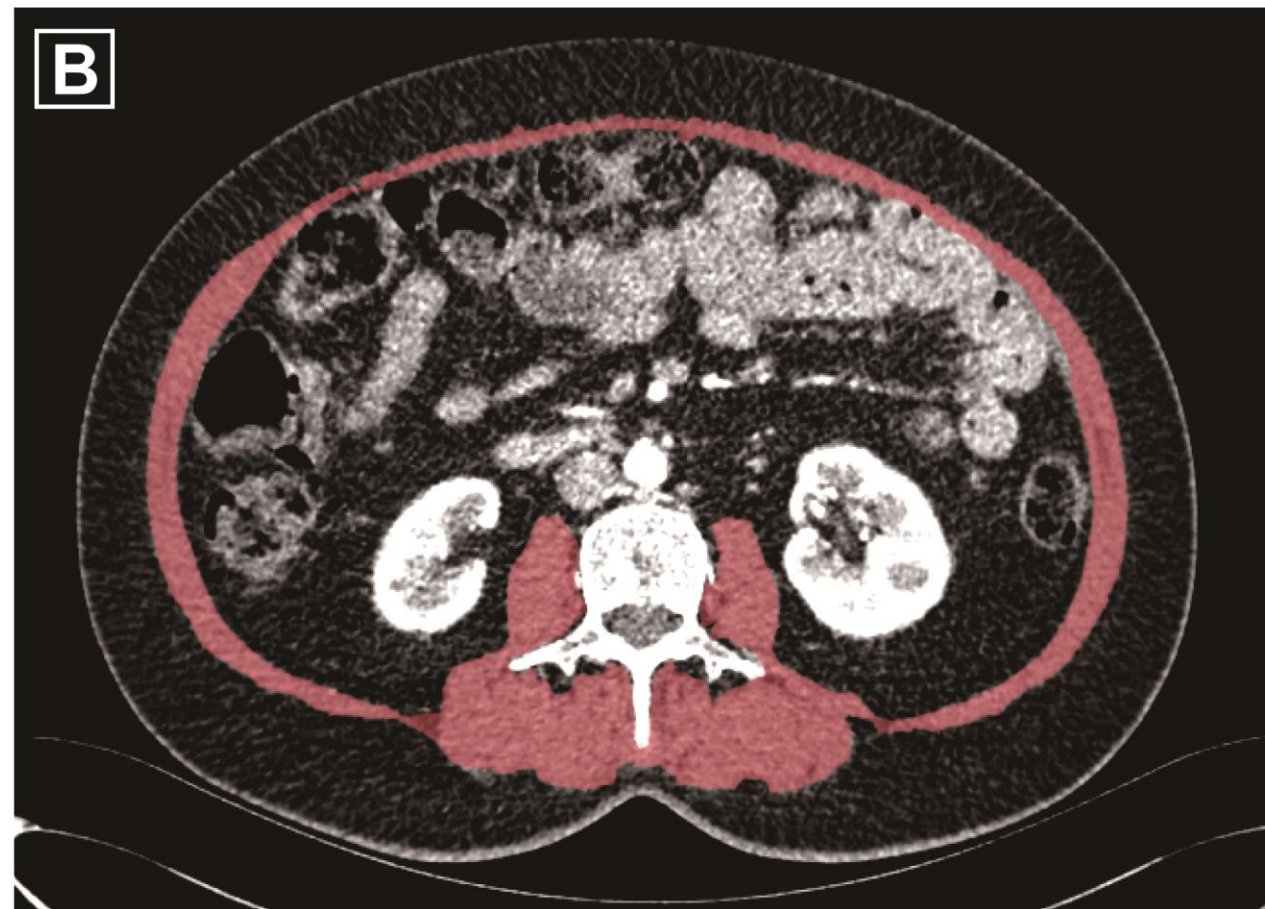

**Supplement Figure 1.** Measurement of skeletal muscle area at the level of L3.

Supplement: ct9-13-e00461-s001.pdf [file ct9-13-e00461-s001.pdf]
